# Supplementary material for: Colorectal Surgery in the COVID-19 Era: A Systematic Review and Meta-Analysis
Source: Cancers (Basel). 2022 Feb 27;14(5):1229. doi: 10.3390/cancers14051229 (PMC8909364; doi:10.3390/cancers14051229)
Supplement: Supplementary file 1 [file cancers-14-01229-s001.zip › cancers-1549321-supplementary.pdf]

Supplementary Material

# Colorectal Surgery in the COVID-19 Era: A Systematic Review and Meta-Analysis

Nikolaos Pararas, Anastasia Pikouli, Dimitrios Papaconstantinou, Georgios Bagias, Constantinos Nastos, Andreas Pikoulis, Dionysios Dellaportas, Panagis Lykoudis and Emmanouil Pikoulis

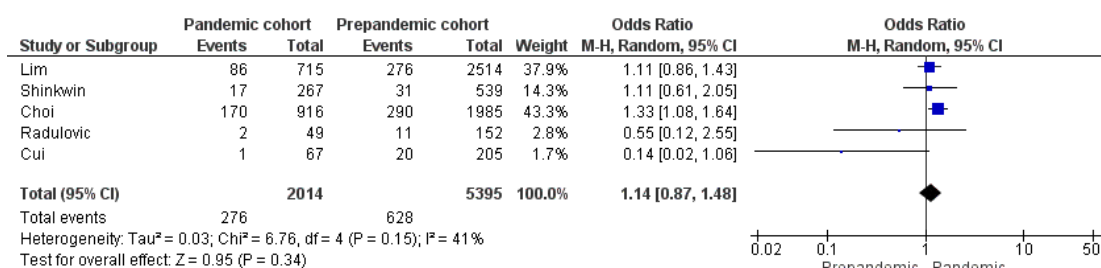

Figure S1. Tis-T1 stage forest plot.

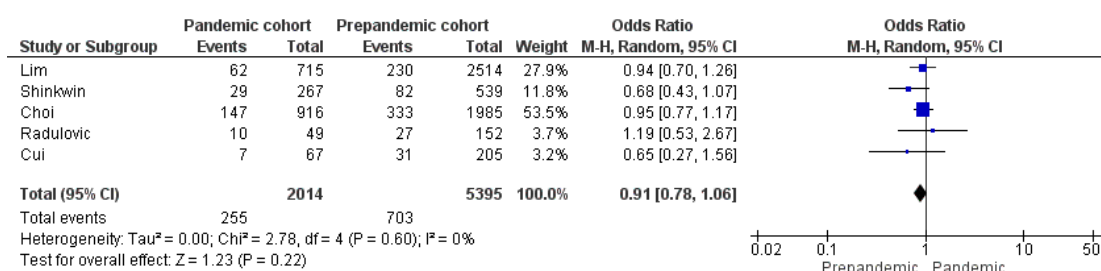

Figure S2. T2 stage forest plot.

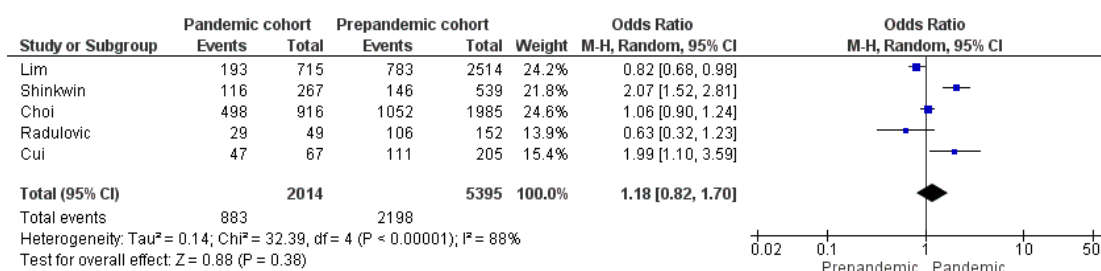

Figure S3. T3 stage forest plot.

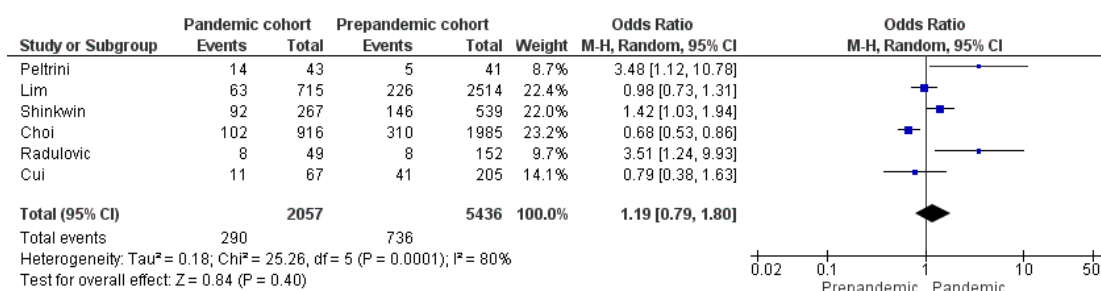

Figure S4. T4 stage forest plot.

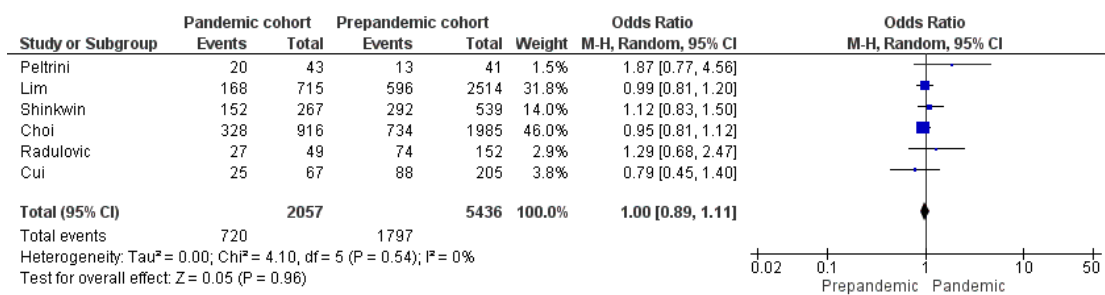

Figure S5. Node positive tumors forest plot.

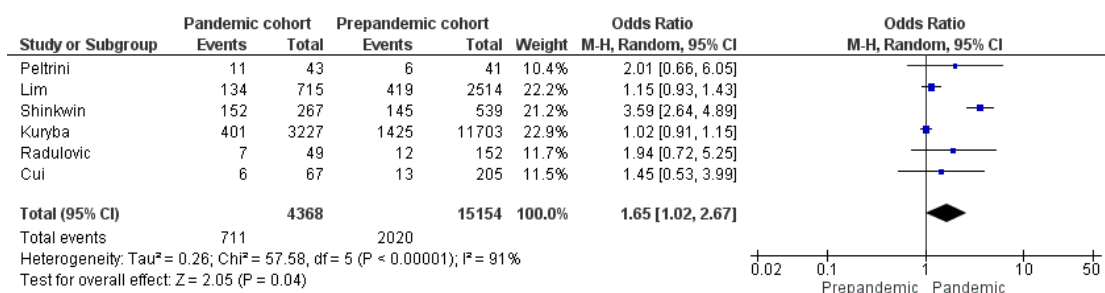

Figure S6. Metastatic tumors forest plot.

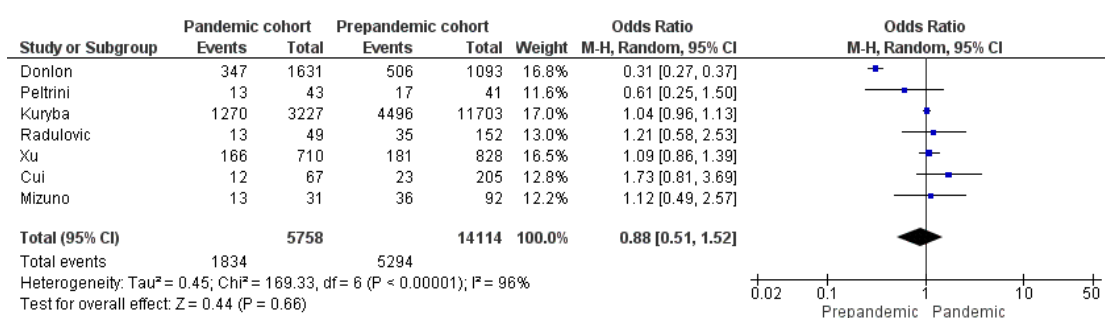

Figure S7. Right-sided tumors forest plot.

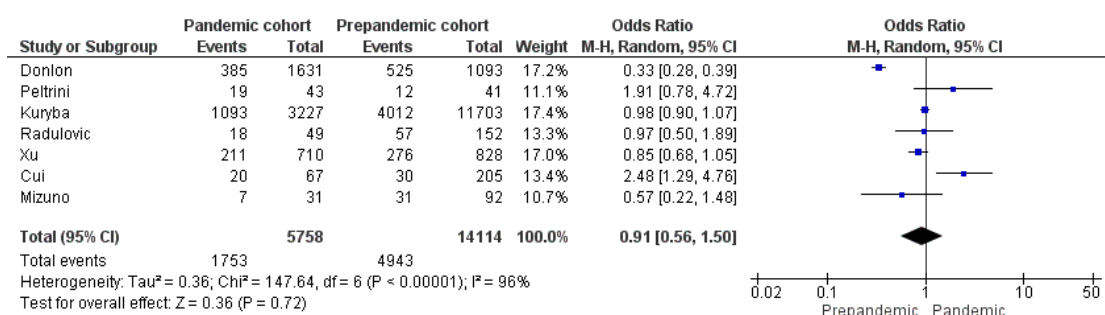

Figure S8. Left-sided tumors forest plot.

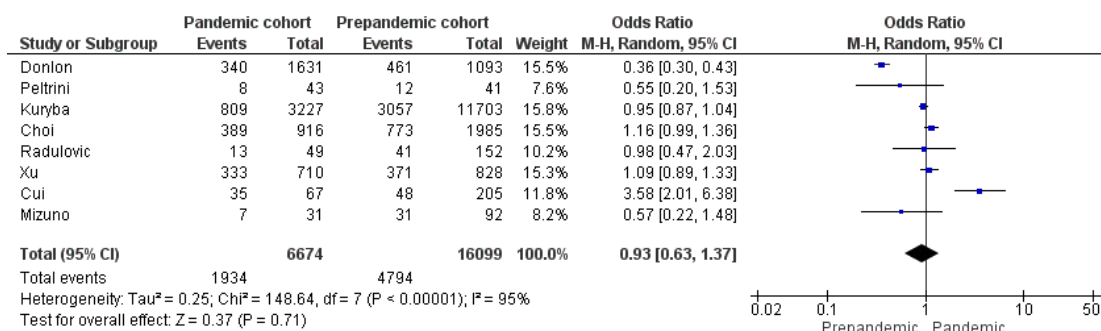

Figure S9. Rectal tumors forest plot.

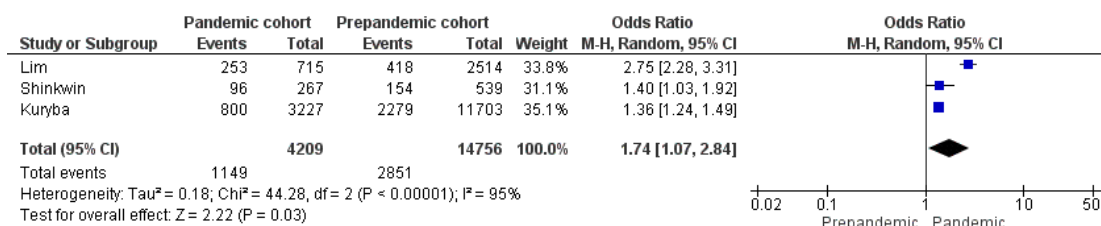

Figure S10. Emergency presentation forest plot.

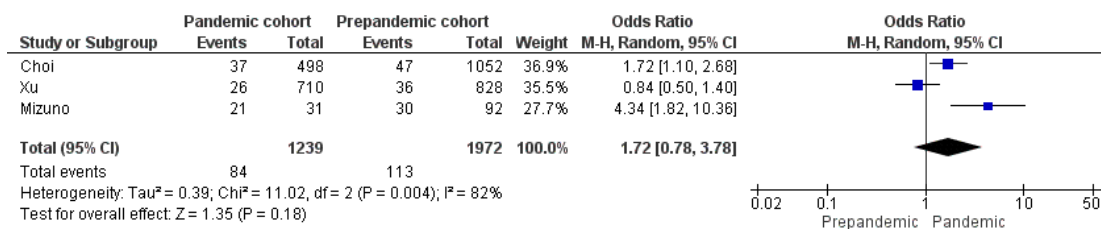

Figure S11. Complicated tumors forest plot.

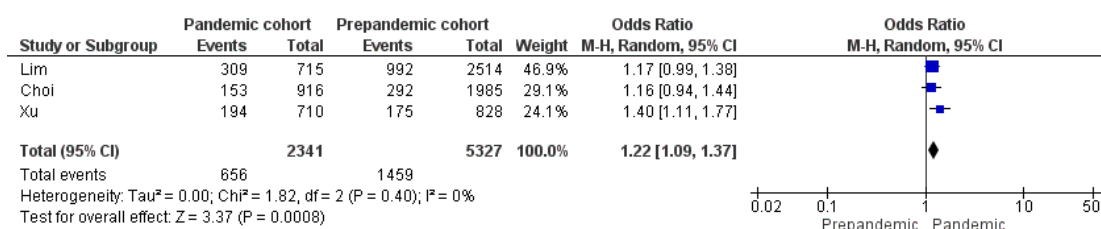

Figure S12. Neoadjuvant utilization forest plot.

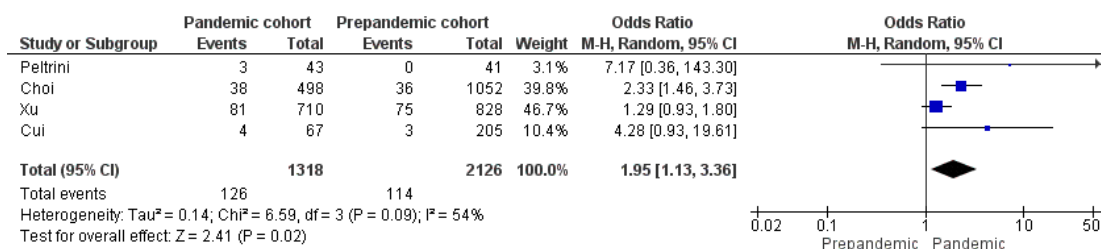

Figure S13. Palliative intent surgery forest plot.

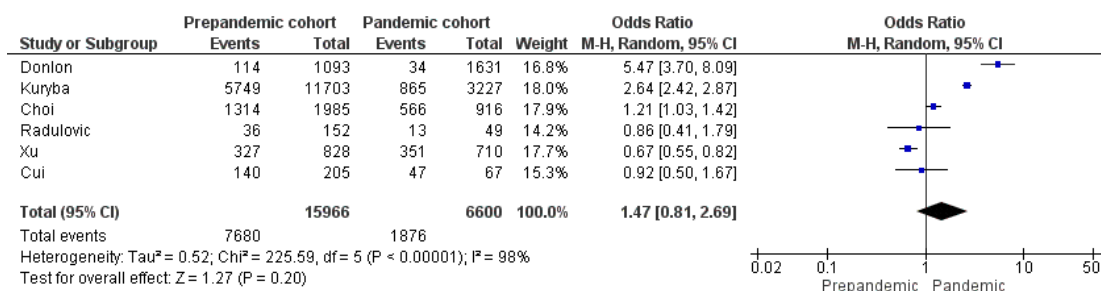

Figure S14. Minimally invasive surgery forest plot.

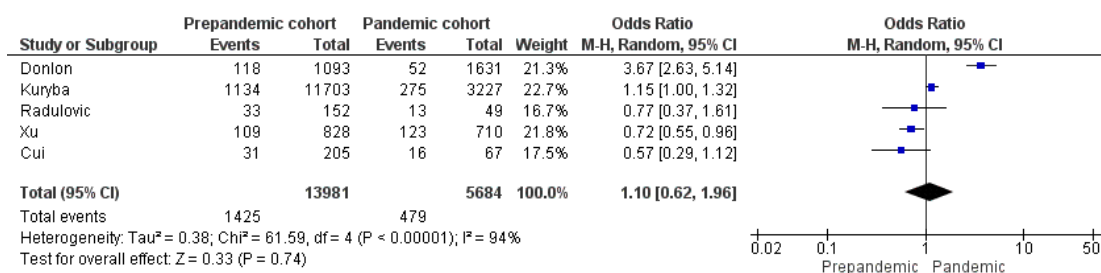

Figure S15. Stoma formation forest plot.

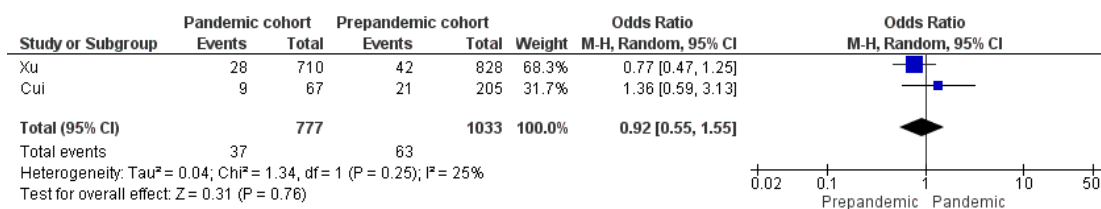

Figure S16. Morbidity forest plot.

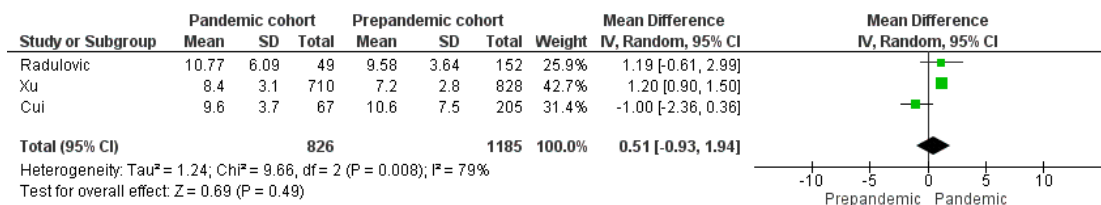

Figure S17. Length of hospital stay forest plot.

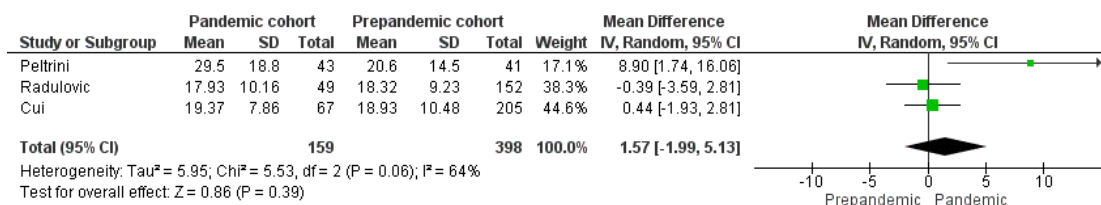

Figure S18. Lymph node harvest forest plot.

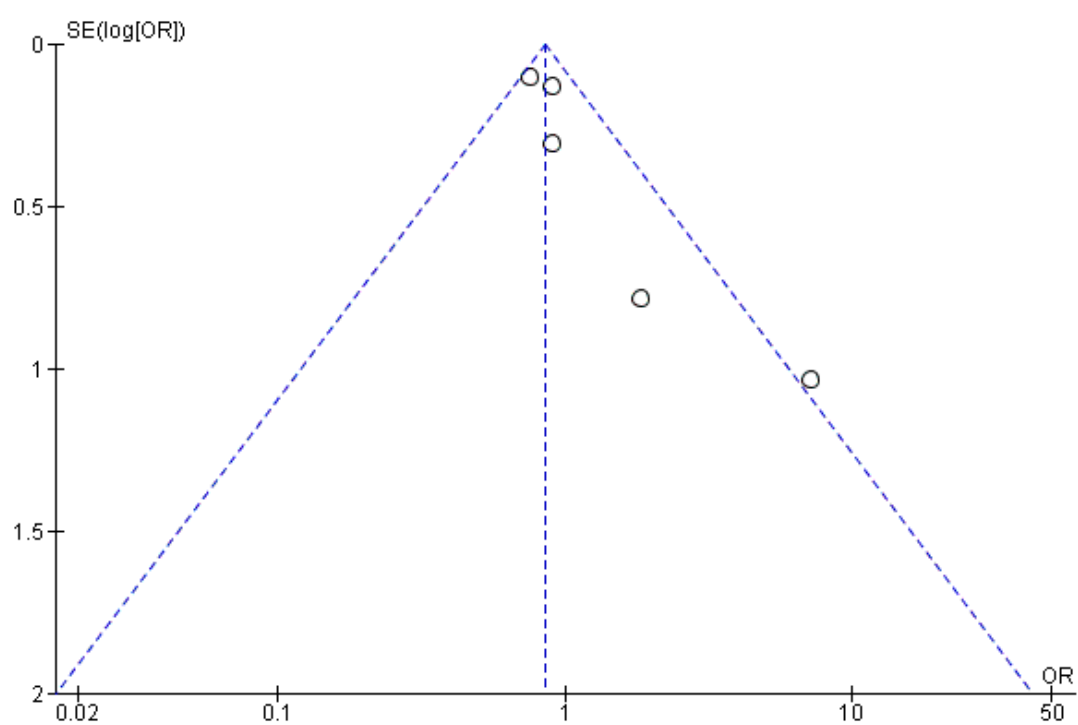

Figure S19. Tis-T1 stage funnel plot.

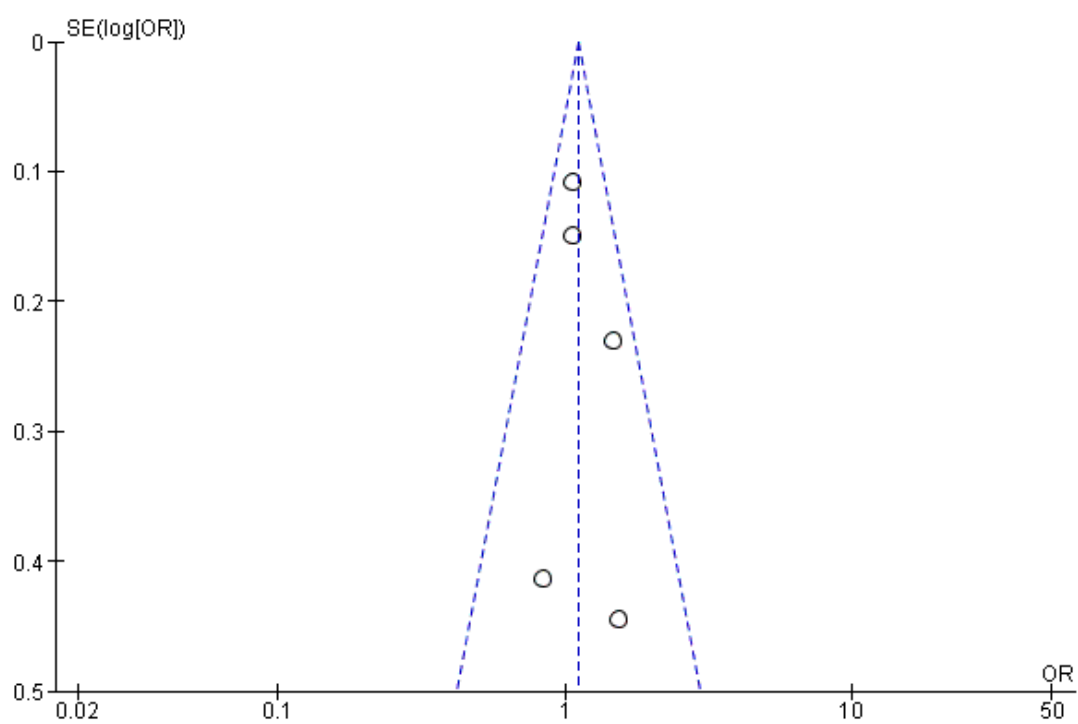

Figure S20. T2 stage funnel plot.

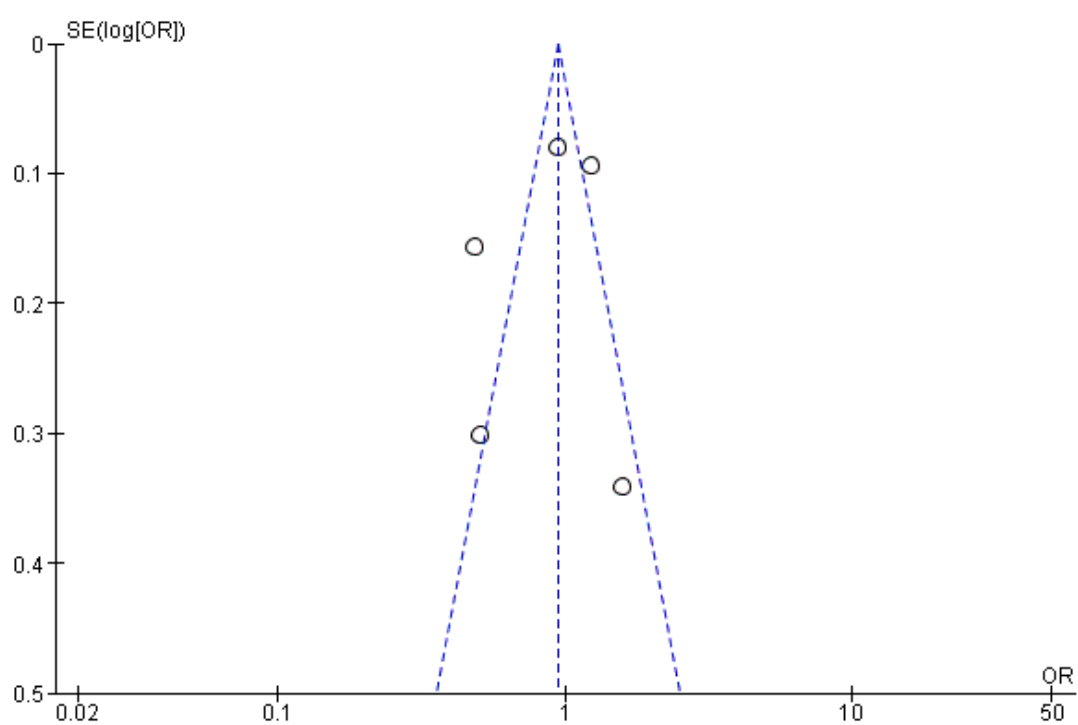

Figure S21. T3 stage funnel plot.

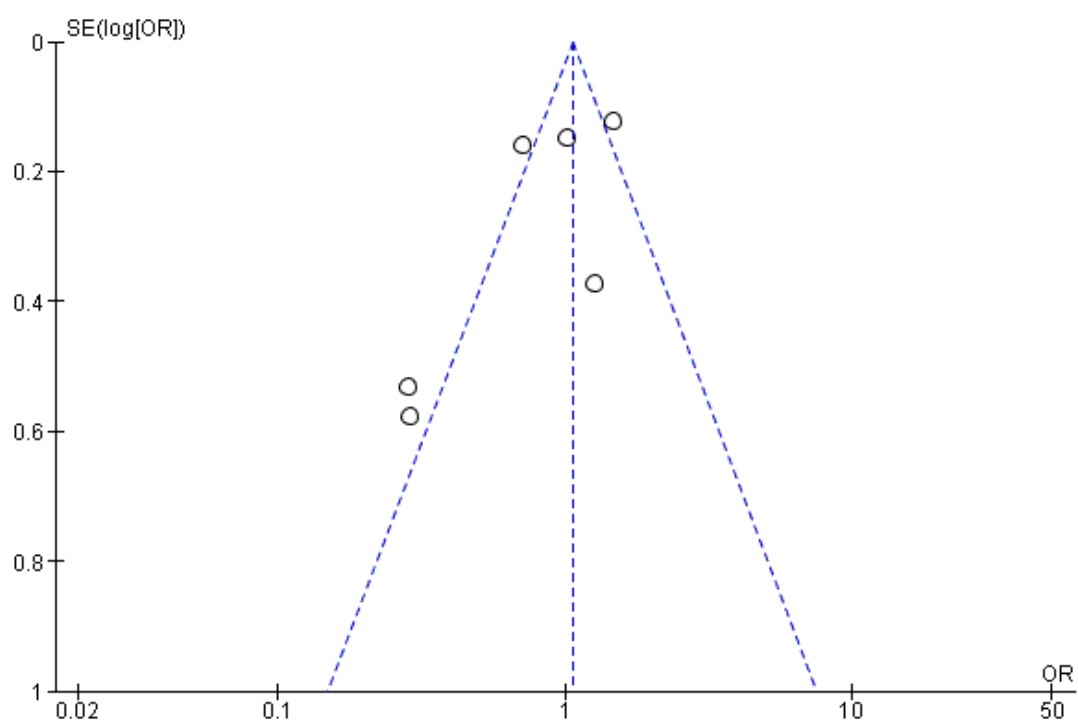

Figure S22. T4 stage funnel plot.

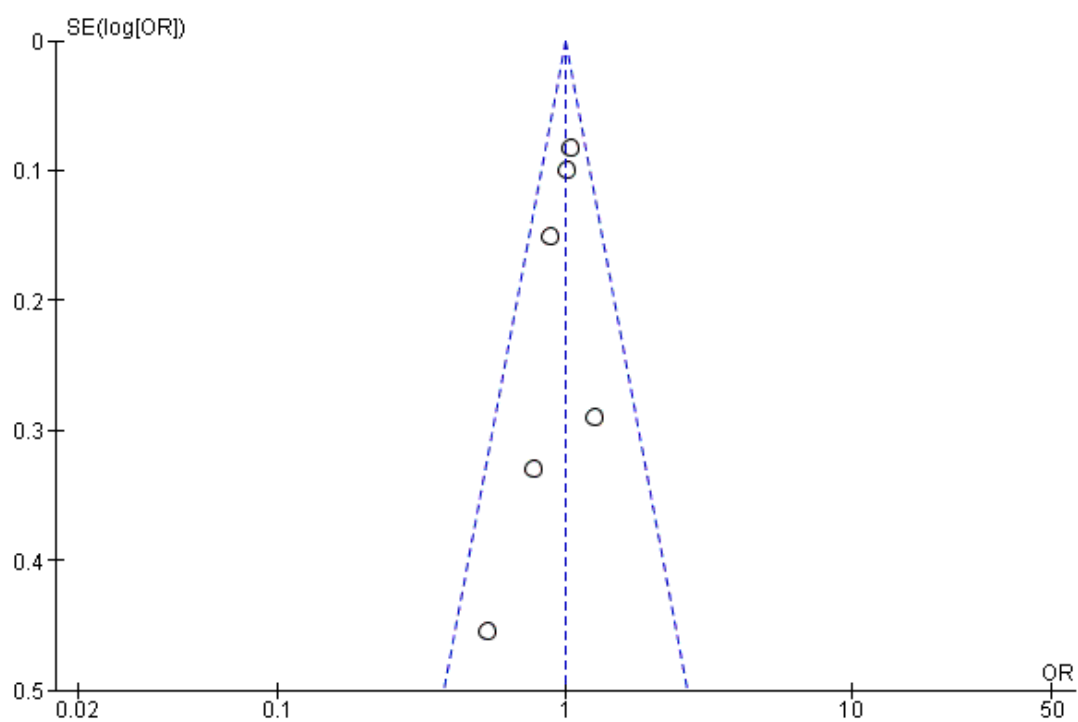

Figure S23. Node positive tumors funnel plot.

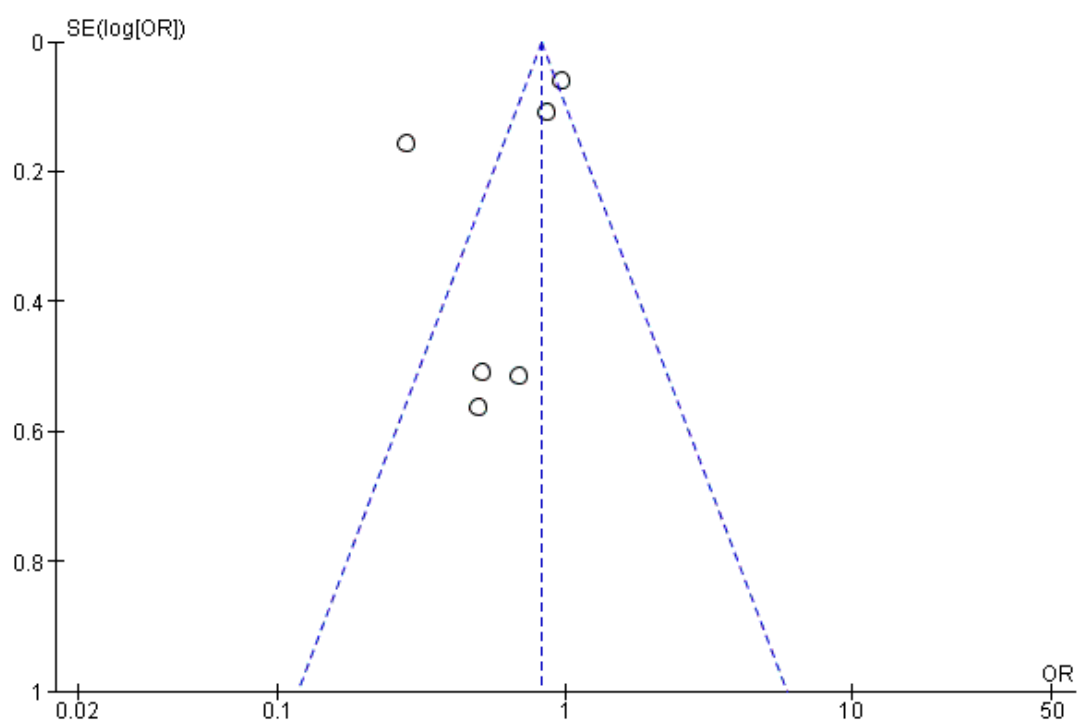

Figure S24. Metastatic tumors funnel plot.

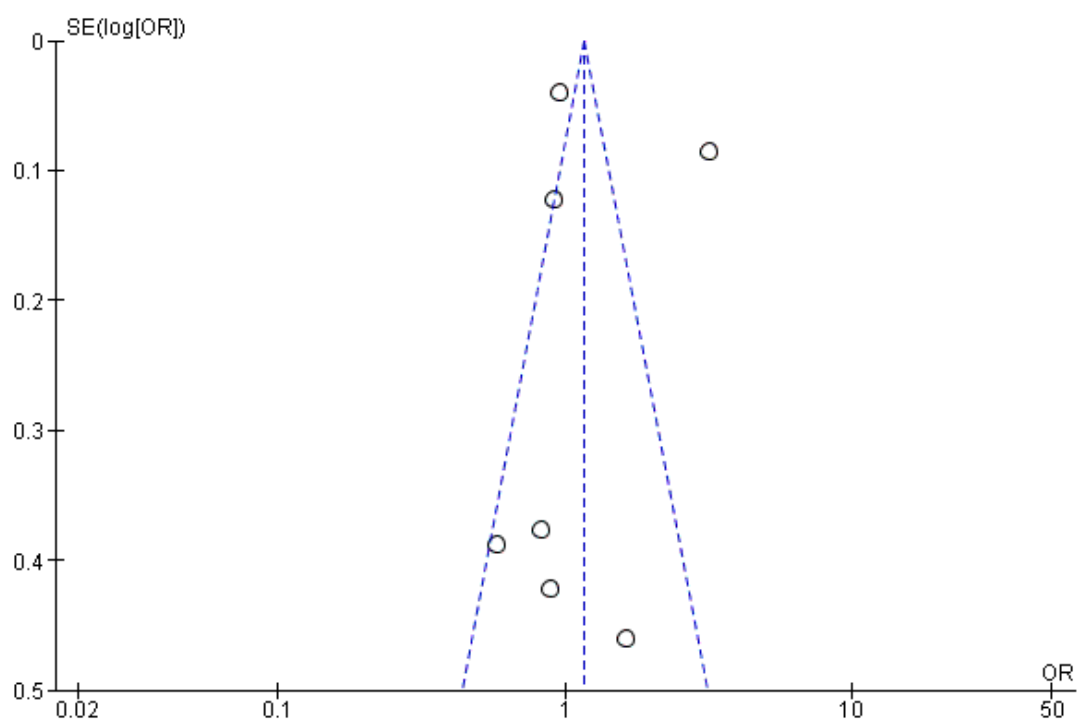

Figure S25. Right-sided tumors funnel plot.

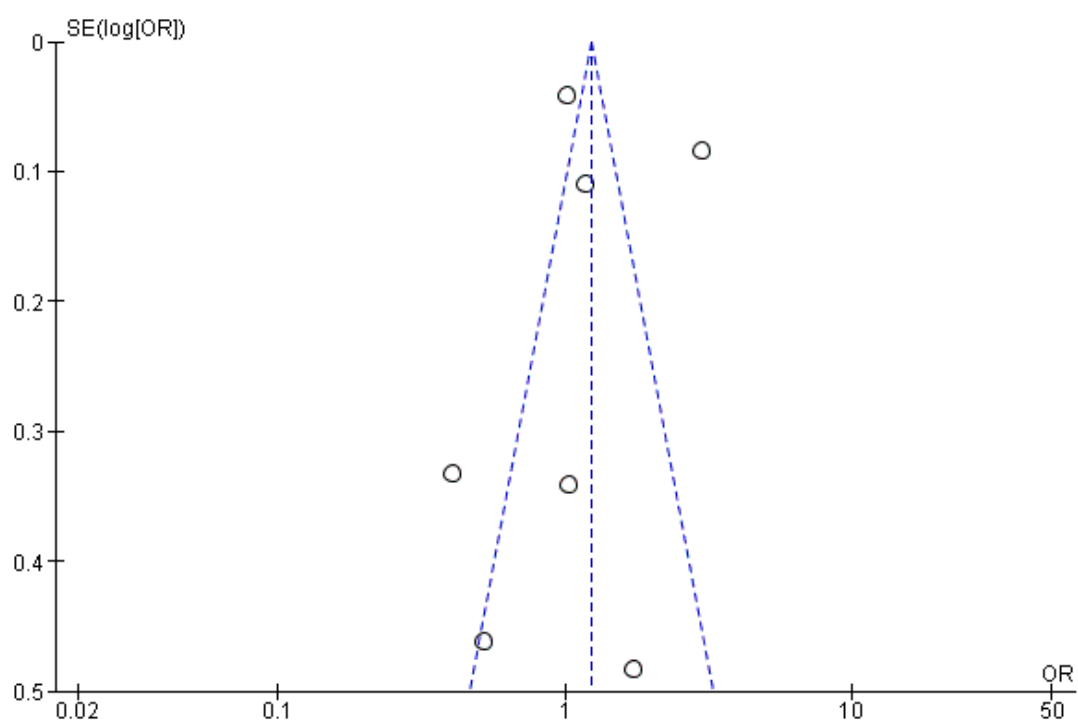

Figure S26. Left-sided tumors funnel plot.

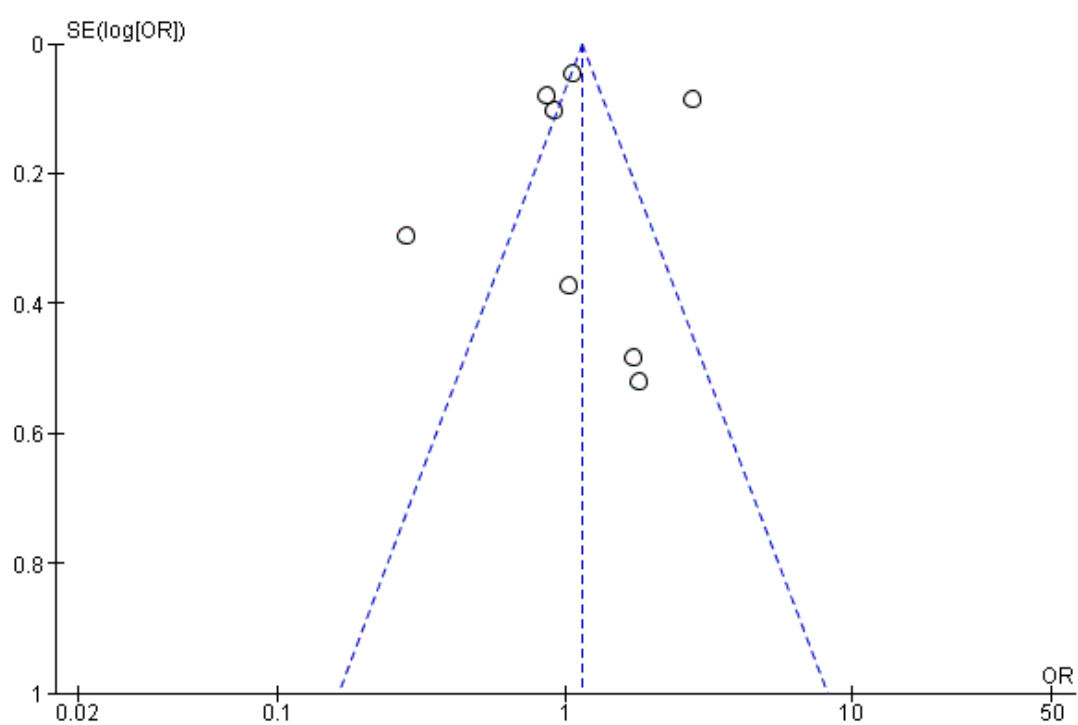

Figure S27. Rectal tumors funnel plot.

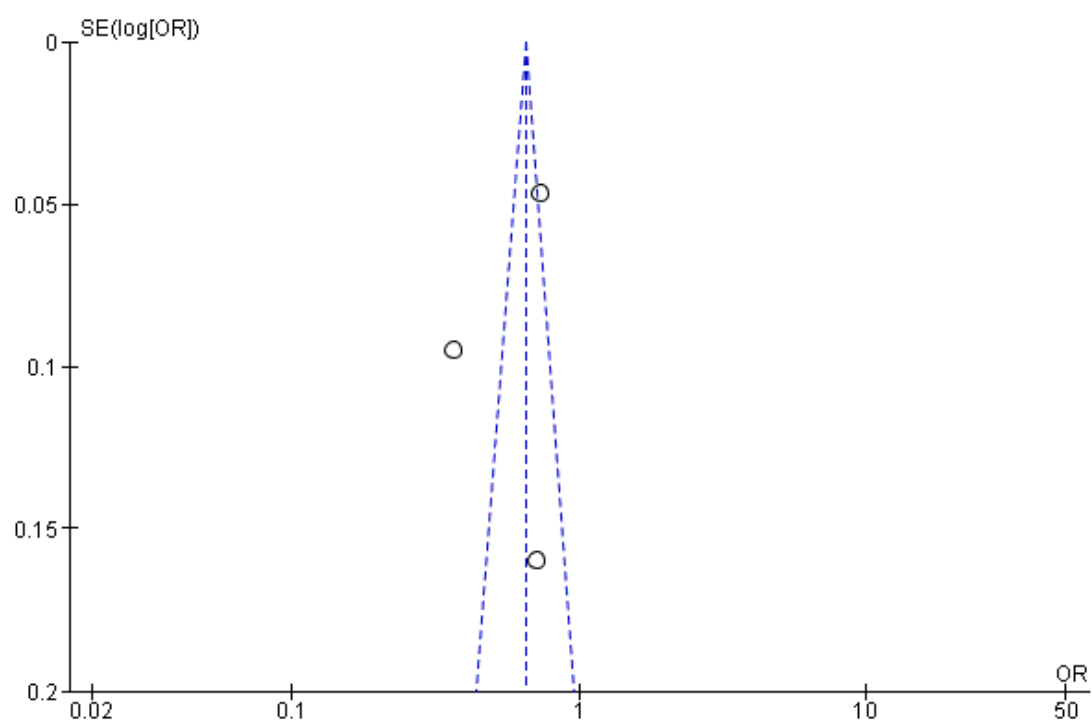

Figure S28. Emergency presentation funnel plot.

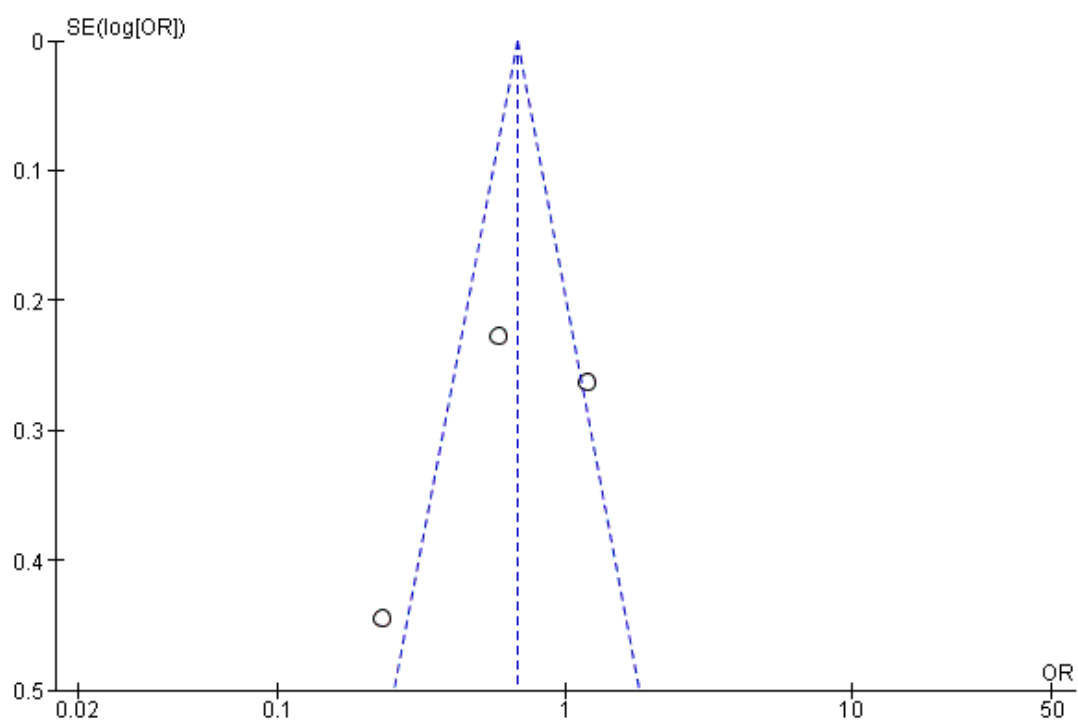

Figure S29. Funnel plot of complicated tumors.

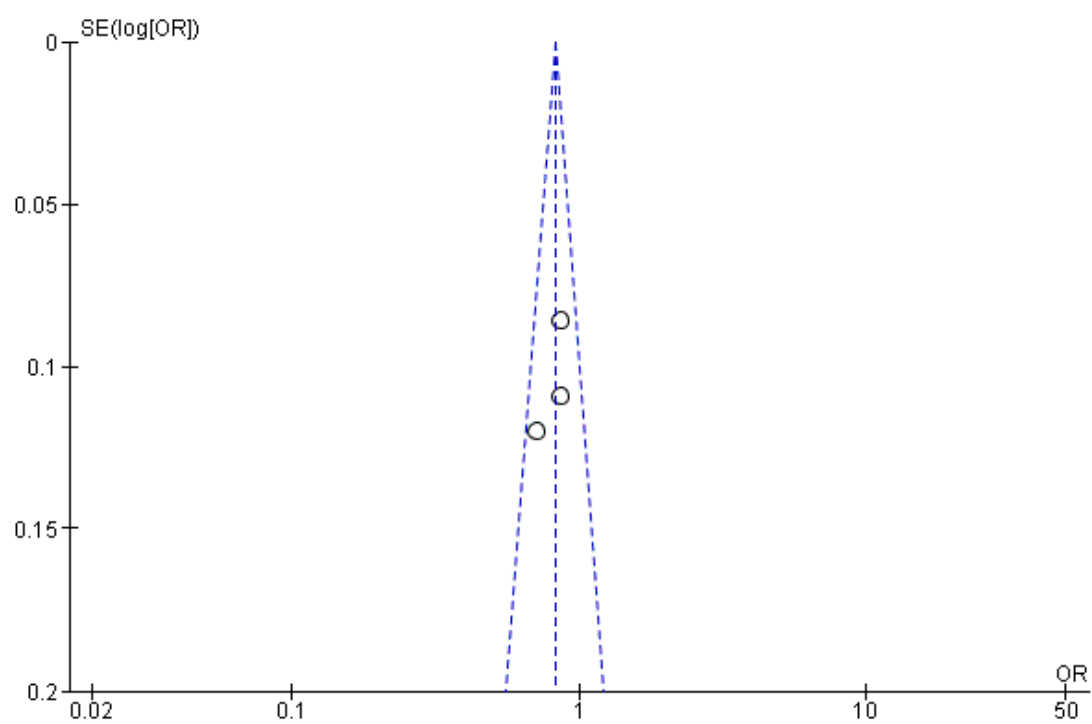

Figure S30. Neoadjuvant utilization funnel plot.

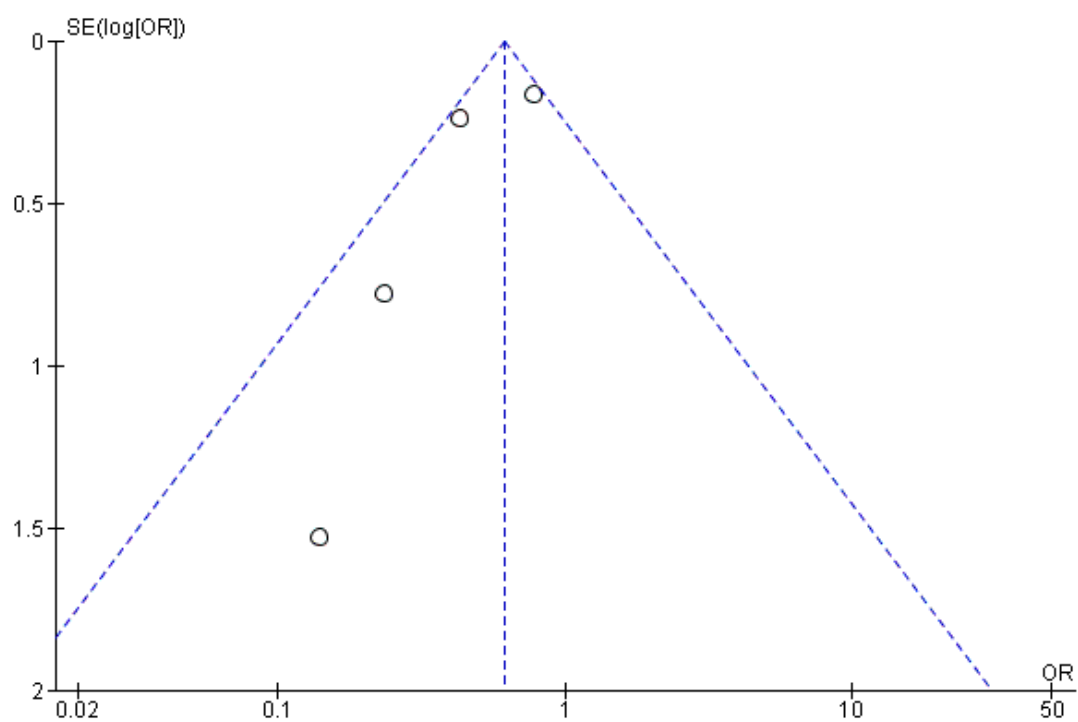

**Figure S31.** Palliative intent surgery funnel plot.

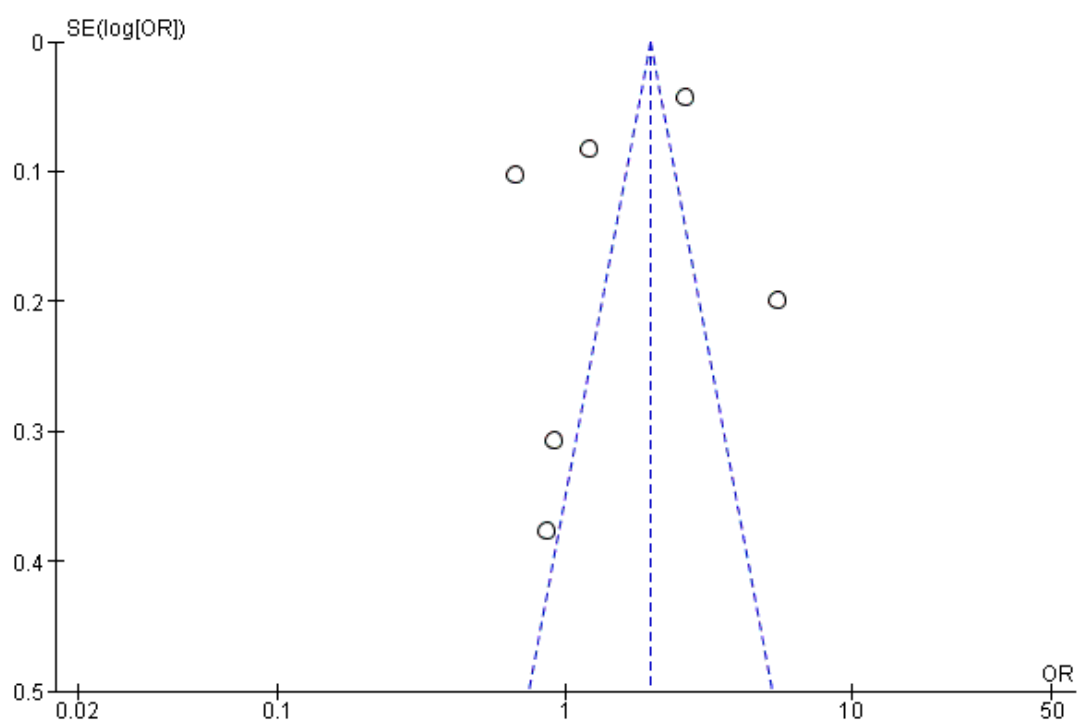

**Figure S32.** Minimally invasive surgery funnel plot.

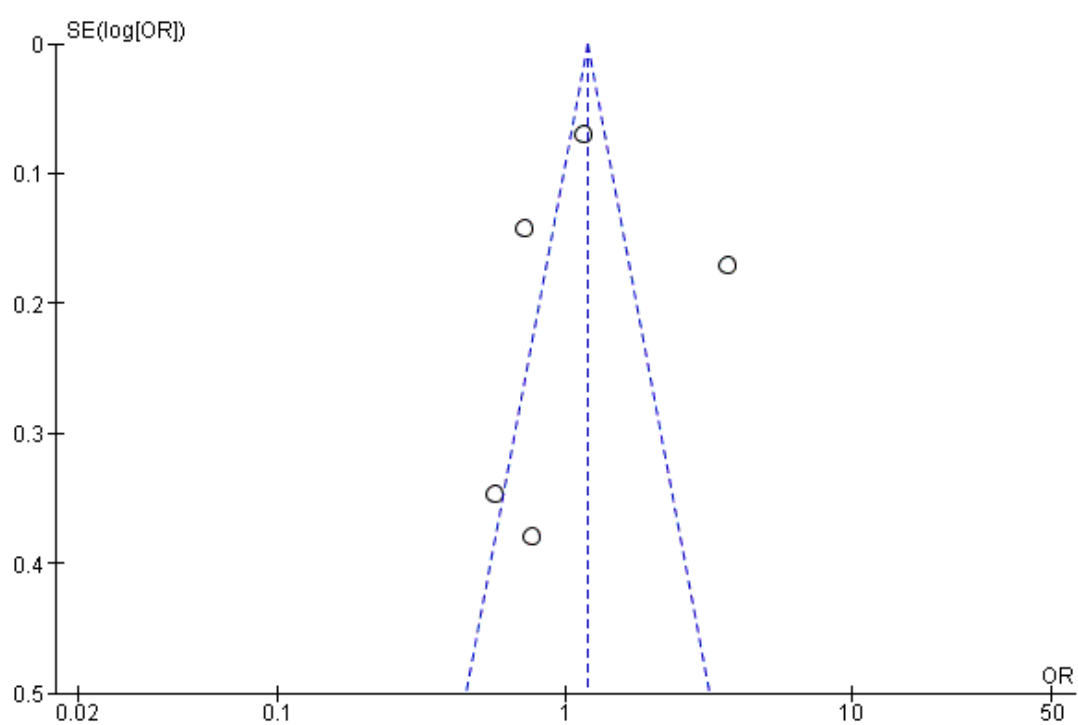

Figure S33. Stoma formation funnel plot.

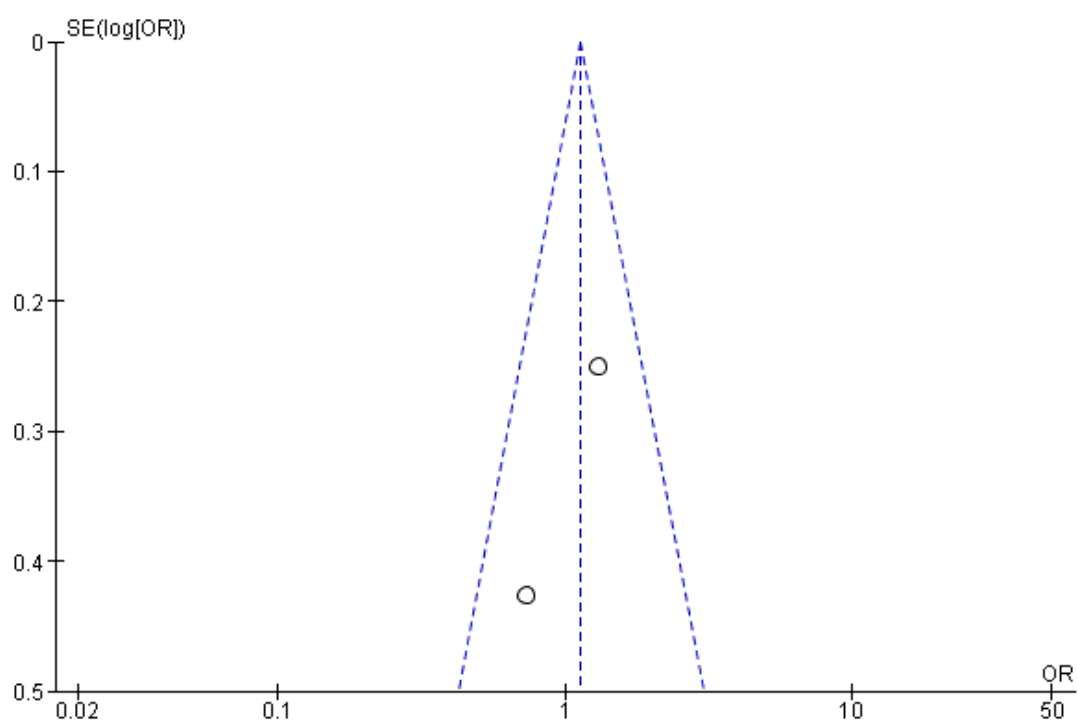

Figure S34. Morbidity funnel plot.

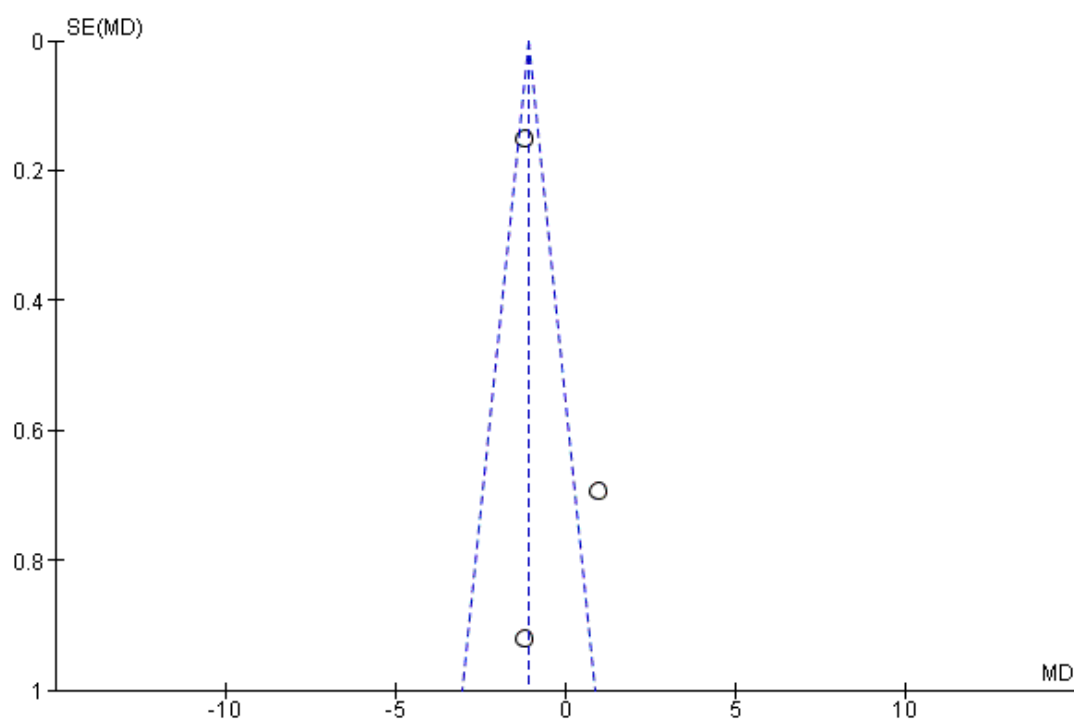

Figure S35. Length of hospital stay funnel plot.

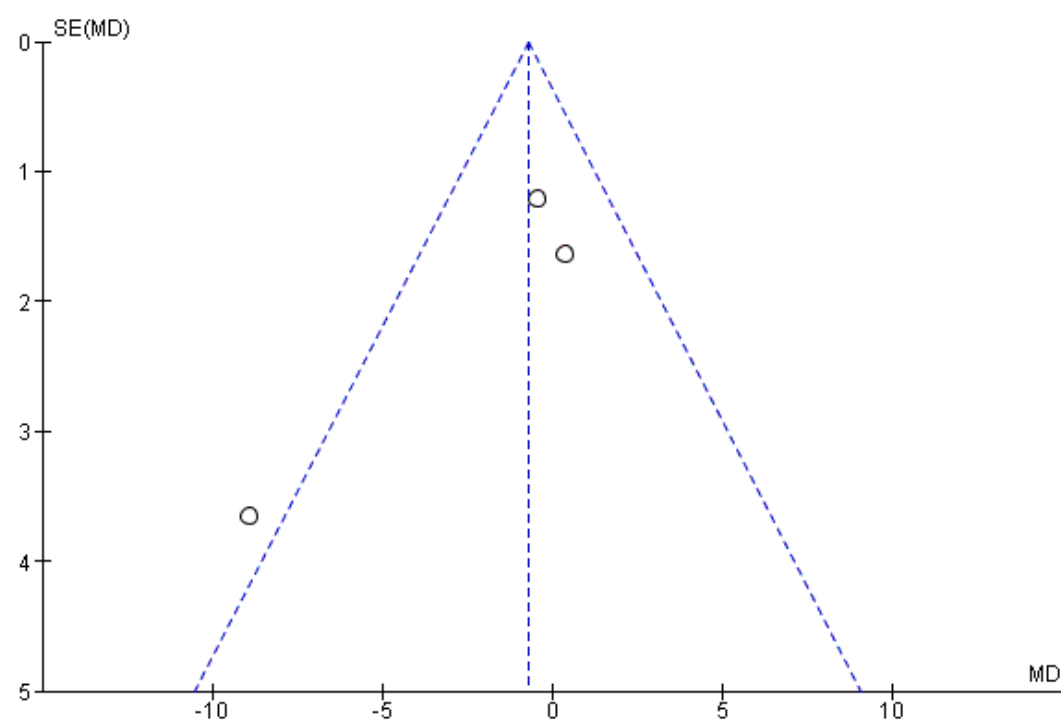

Figure S36. Lymph node harvest funnel plot.
